# Supplementary figures and images for: Influence of Food and Beverage Companies on Retailer Marketing Strategies and Consumer Behavior
Source: MDPI journal article supplement (doi:10.3390/ijerph17207381), 2020-10-10

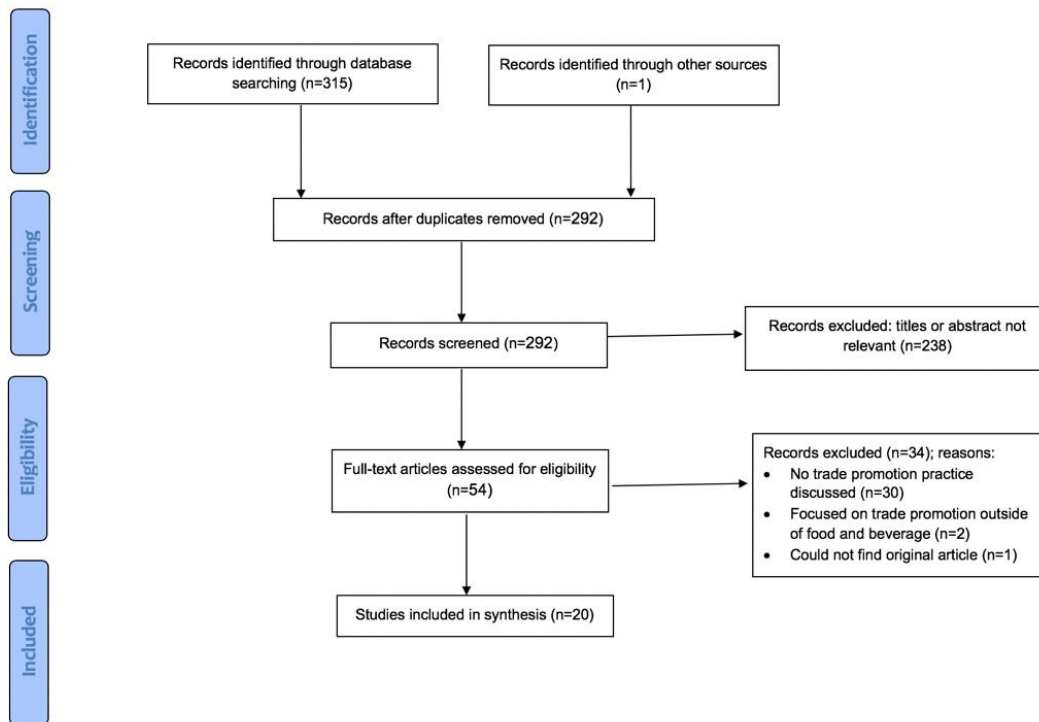

Supplement: s1 [file s1]

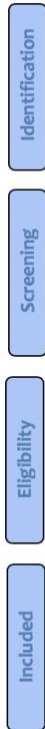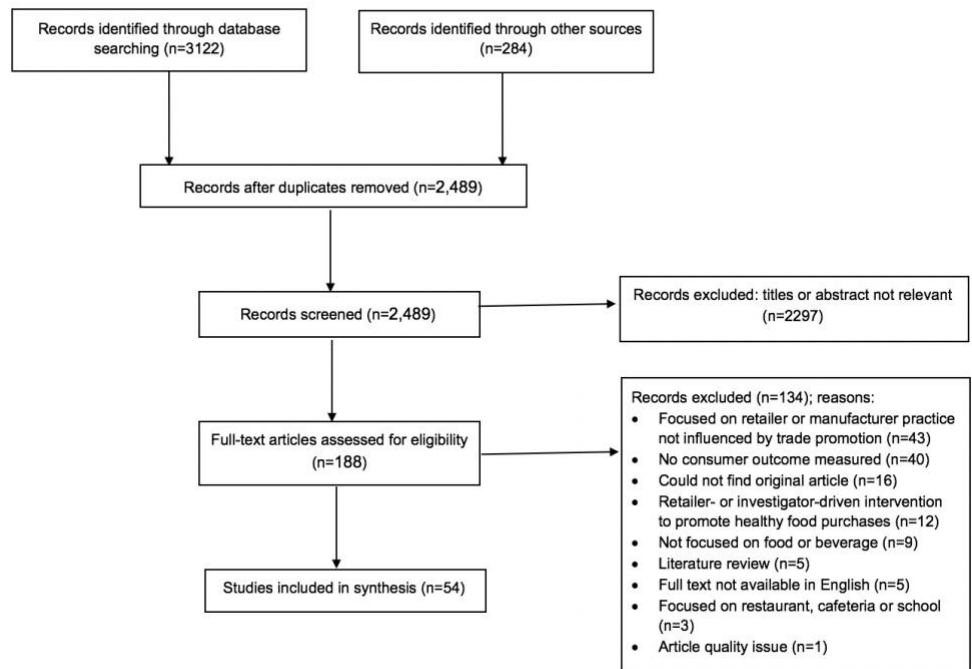

Supplement: s1 [file s1]
